# Supplementary material for: Primary and Revision Rhinoplasty: A Single Surgeon Experience and Patient Satisfaction
Source: PubMed Central journal article supplement — Plast Reconstr Surg Glob Open. 2021 Sep 13;9(9):e3798. doi: 10.1097/GOX.0000000000003798 (PMC8432634; doi:10.1097/gox.0000000000003798), 2021-09-13
Supplement: gox-9-e3798-s001.pdf [file gox-9-e3798-s001.pdf]

## **SDC 1. Survey Questions**

**What was the reason for your rhinoplasty?**

Functional

Cosmetic

Both functional and cosmetic

**How satisfied are you with the functional aspects of your nose since your surgery?**

Very dissatisfied

Somewhat dissatisfied

Neither satisfied nor dissatisfied

Somewhat satisfied

Very satisfied

**How satisfied are you with the appearance of your nose since your surgery?**

Very dissatisfied

Somewhat dissatisfied

Neither satisfied nor dissatisfied

Somewhat satisfied

Very satisfied
