# Supplementary material for: Primary and Revision Rhinoplasty: A Single Surgeon Experience and Patient Satisfaction
Source: PubMed Central journal article supplement — Plast Reconstr Surg Glob Open. 2021 Sep 13;9(9):e3798. doi: 10.1097/GOX.0000000000003798 (PMC8432634; doi:10.1097/gox.0000000000003798), 2021-09-13
Supplement: gox-9-e3798-s002.pdf [file gox-9-e3798-s002.pdf]

**SDC 2. Rib versus Auricular Cartilage Clinical Post-Operative Complications**

| Variable                                        | Graft type                  |                                   | <i>p-value</i> |
|-------------------------------------------------|-----------------------------|-----------------------------------|----------------|
|                                                 | Rib cartilage<br>(n=14) (%) | Auricular cartilage<br>(n=20) (%) |                |
| Hematoma                                        | 0 (0)                       | 0 (0)                             | ---            |
| Infection                                       | 4 (28.6)                    | 1 (5.0)                           | 0.135          |
| Qualitative Functional Improvement <sup>+</sup> | 14 (100)                    | 20 (100)                          | 1.000          |
| Qualitative Aesthetic Improvement <sup>+</sup>  | 12 (85.7)                   | 16 (80.0)                         | 0.842          |

<sup>+</sup>One-month post-surgery
