# Supplementary figures and images for: Primary and Revision Rhinoplasty: A Single Surgeon Experience and Patient Satisfaction
Source: PubMed Central journal article supplement — Plast Reconstr Surg Glob Open. 2021 Sep 13;9(9):e3798. doi: 10.1097/GOX.0000000000003798 (PMC8432634; doi:10.1097/gox.0000000000003798), 2021-09-13

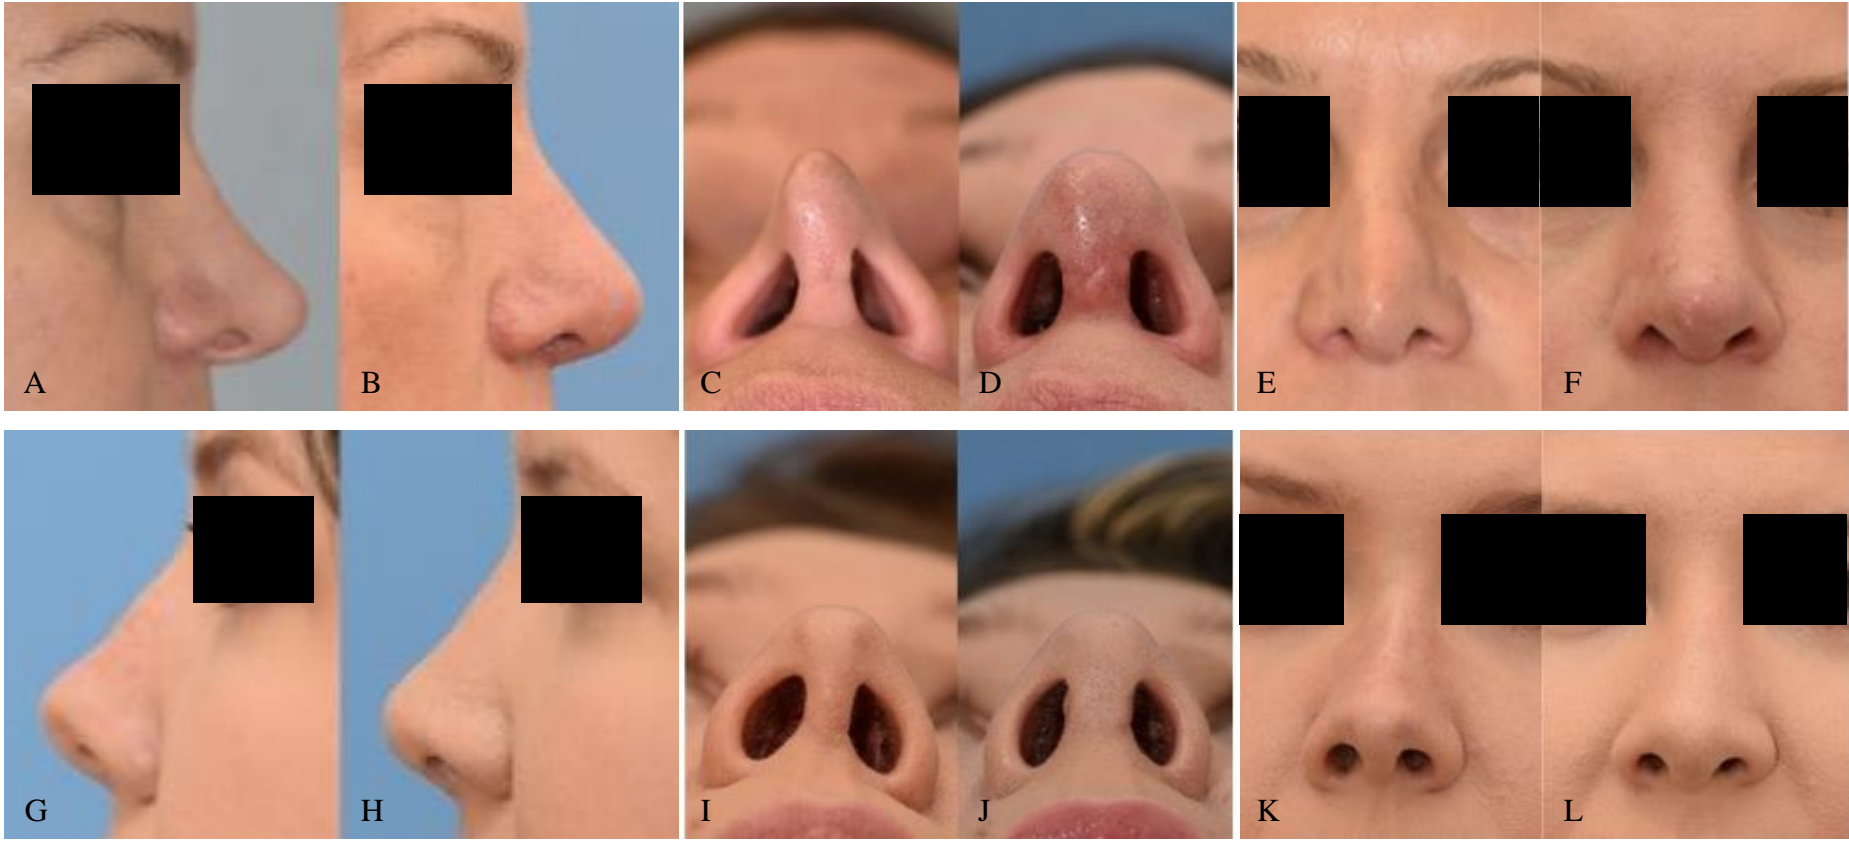

Supplement: gox-9-e3798-s003.pdf [file gox-9-e3798-s003.pdf]
